# Supplementary material
Source: publisher site journal article supplement (https://e-cmh.org/upload/media/cmh-2024-0038-Supplementary-Fig-5.pdf)
Supplement: Supplementary file 1 [file cmh-2024-0038-Supplementary-Fig-5.pdf]

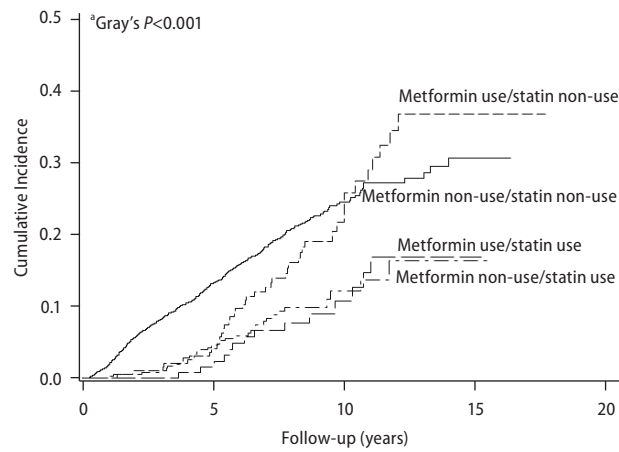

| Variables                                             | P-value, SHR and 95% CI         |
|-------------------------------------------------------|---------------------------------|
| Statin * metformin                                    | $P = 0.820$                     |
| Statin non-use vs. statin use at metformin no-user    | SHR (95% CI) = 2.42 (1.71-3.44) |
| Statin non-use vs. statin use at metformin user       | SHR (95% CI) = 2.23 (1.25-4.01) |
| Metformin non-use vs. metformin use at statin no-user | SHR (95% CI) = 1.12 (0.84-1.51) |
| Metformin non-use vs. metformin use at statin user    | SHR (95% CI) = 1.04 (0.56-1.91) |

**Supplementary Figure 5.** Interaction of effects of statin and metformin on the incidence of HCC. <sup>a</sup>After considering death as a competing risk, a Kaplan–Meier plot was constructed using Gray’s cumulative incidence method. <sup>b</sup>All SHRs (95% CIs) and  $P$ -values were calculated using the Cox sub-distribution hazards method. SHR, sub-distribution hazard ratio.
